# Supplementary material
Source: HighWire-hosted journal article supplement (https://cmaj.ca/highwire/filestream/58351/field_highwire_adjunct_files/0/revisit-latino-1-at.pdf)
Supplement: revisit-latino-1-at.pdf [file revisit-latino-1-at.pdf]

| Appendix 1: Supporting websites for information on recommended limits of alcohol consumption in some countries. |                                                                                                                                                                                                                                                                                                                                                                                 |
|-----------------------------------------------------------------------------------------------------------------|---------------------------------------------------------------------------------------------------------------------------------------------------------------------------------------------------------------------------------------------------------------------------------------------------------------------------------------------------------------------------------|
| Country                                                                                                         | Institutional source; supporting website†                                                                                                                                                                                                                                                                                                                                       |
| Australia                                                                                                       | National Health and Medical Research Council;<br><a href="http://www.nhmrc.gov.au/_files_nhmrc/file/publications/synopses/ds10-alcohol.pdf">www.nhmrc.gov.au/_files_nhmrc/file/publications/synopses/ds10-alcohol.pdf</a>                                                                                                                                                       |
| Austria                                                                                                         | Ministry of Health;<br><a href="http://www.api.or.at/akis/download/habaoe%202009a.pdf">www.api.or.at/akis/download/habaoe%202009a.pdf</a>                                                                                                                                                                                                                                       |
| Bulgaria                                                                                                        | National Center of Public Health Protection;<br><a href="http://fnap.government.bg/UserFiles/File/ENGL%20sait/_HraneneEnglish.pdf">http://fnap.government.bg/UserFiles/File/ENGL%20sait/_HraneneEnglish.pdf</a>                                                                                                                                                                 |
| Canada                                                                                                          | Center for Addiction and Mental Health;<br><a href="http://www.camh.net/About_Addiction_Mental_Health/Drug_and_Addiction_Information/low_risk_drinking_guidelines.html">www.camh.net/About_Addiction_Mental_Health/Drug_and_Addiction_Information/low_risk_drinking_guidelines.html</a>                                                                                         |
| Denmark                                                                                                         | Ministry of Health and Prevention, National Board of Health;<br><a href="http://www.sst.dk/Sundhed%20og%20forebyggelse/Alkohol.aspx">www.sst.dk/Sundhed%20og%20forebyggelse/Alkohol.aspx</a>                                                                                                                                                                                    |
| France                                                                                                          | French Institute for Prevention and Health Education;<br><a href="http://www.inpes.sante.fr/espace_alcool/reperes/site_risques_alcool/flash/default.htm">www.inpes.sante.fr/espace_alcool/reperes/site_risques_alcool/flash/default.htm</a>                                                                                                                                     |
| Great Britain                                                                                                   | National Health Service;<br><a href="http://www.drinking.nhs.uk">www.drinking.nhs.uk</a>                                                                                                                                                                                                                                                                                        |
| Ireland                                                                                                         | Health Service Executive;<br><a href="http://www.yourdrinking.ie/about-alcohol/what-is-a-standard-drink/">www.yourdrinking.ie/about-alcohol/what-is-a-standard-drink/</a>                                                                                                                                                                                                       |
| Italy                                                                                                           | Ministry of Health;<br><a href="http://www.ministerosalute.it/stiliVita/documenti/AlcolSeiSicura.pdf">www.ministerosalute.it/stiliVita/documenti/AlcolSeiSicura.pdf</a>                                                                                                                                                                                                         |
| Spain                                                                                                           | Ministry of Health;<br><a href="http://www.pnsd.msc.es/Categoria2/publica/publicaciones/Guia2008/alcohol.htm">www.pnsd.msc.es/Categoria2/publica/publicaciones/Guia2008/alcohol.htm</a>                                                                                                                                                                                         |
| United States                                                                                                   | Centers for Disease Control and Prevention; <a href="http://www.cdc.gov/alcohol/quickstats/general_info.htm">www.cdc.gov/alcohol/quickstats/general_info.htm</a><br><br>US Department of Health and Human Services;<br><a href="http://www.health.gov/dietaryguidelines/dga2005/document/pdf/DGA2005.pdf">www.health.gov/dietaryguidelines/dga2005/document/pdf/DGA2005.pdf</a> |
| †Accessed Dec. 3, 2010.                                                                                         |                                                                                                                                                                                                                                                                                                                                                                                 |
